# Supplementary material for: Mitotic and Proliferative Indices in WHO Grade III Meningioma
Source: Cancers (Basel). 2020 Nov 12;12(11):3351. doi: 10.3390/cancers12113351 (PMC7697885; doi:10.3390/cancers12113351)
Supplement: Supplementary file 1 [file cancers-12-03351-s001.pdf]

# Supplementary Materials: Mitotic and Proliferative Indices in WHO Grade III Meningioma

Andrea Daniela Maier, Christian Beltoft Brøchner, Jiri Bartek Jr., Frank Eriksson, Heidi Ugleholdt, Helle Broholm and Tiit Mathiesen

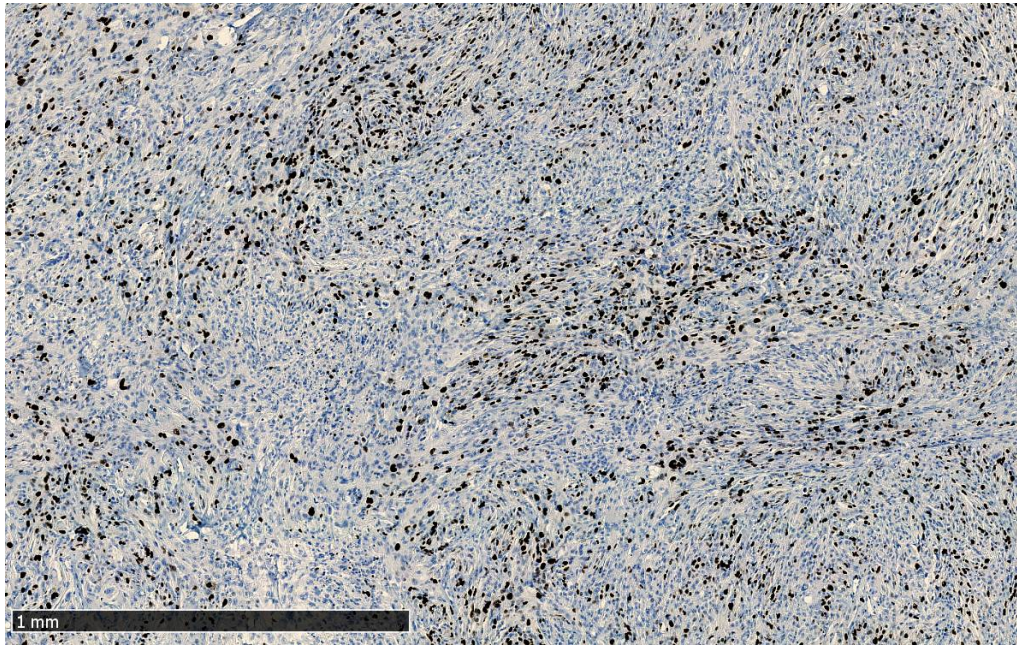

**Figure 1.** Case 1.

Clear hot spot formation with some Ki-67 positive cells between hot spots in a type 2 proliferative pattern. Though it could look like a type 1 tumor, we see underlying proliferative activity between the hot spot formations. Anaplastic meningioma, WHO grade III. Total magnification  $\times 40$ .

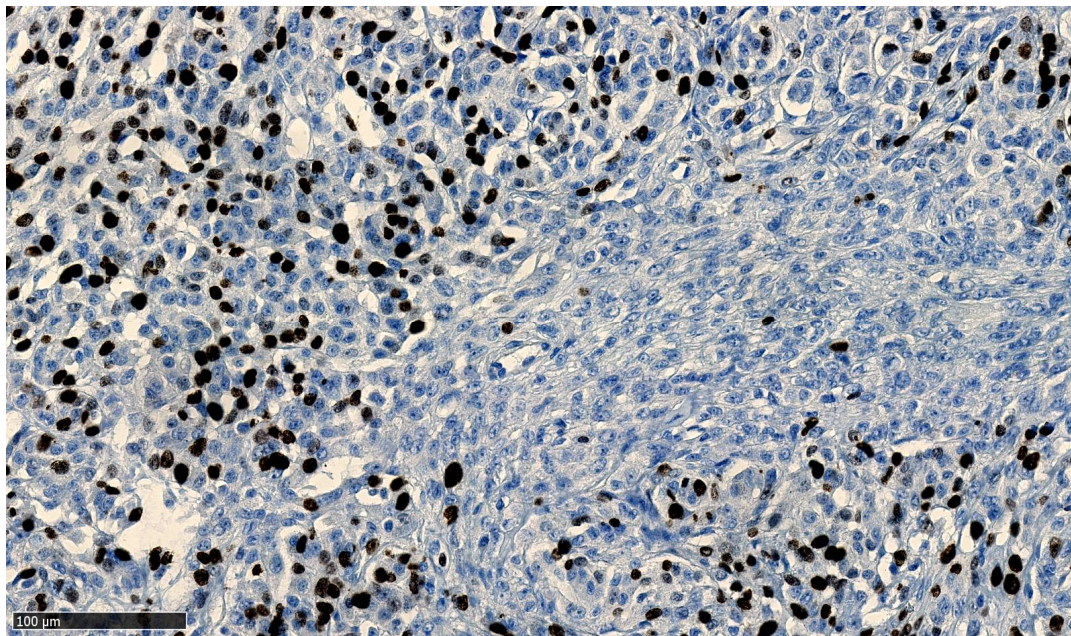

**Figure S2.** Case 2.

Detail of heterogeneous Ki-67 staining in a type 1 proliferative pattern. We see areas with no Ki-67 positivity. Anaplastic meningioma, WHO grade III. Total magnification  $\times 300$ .

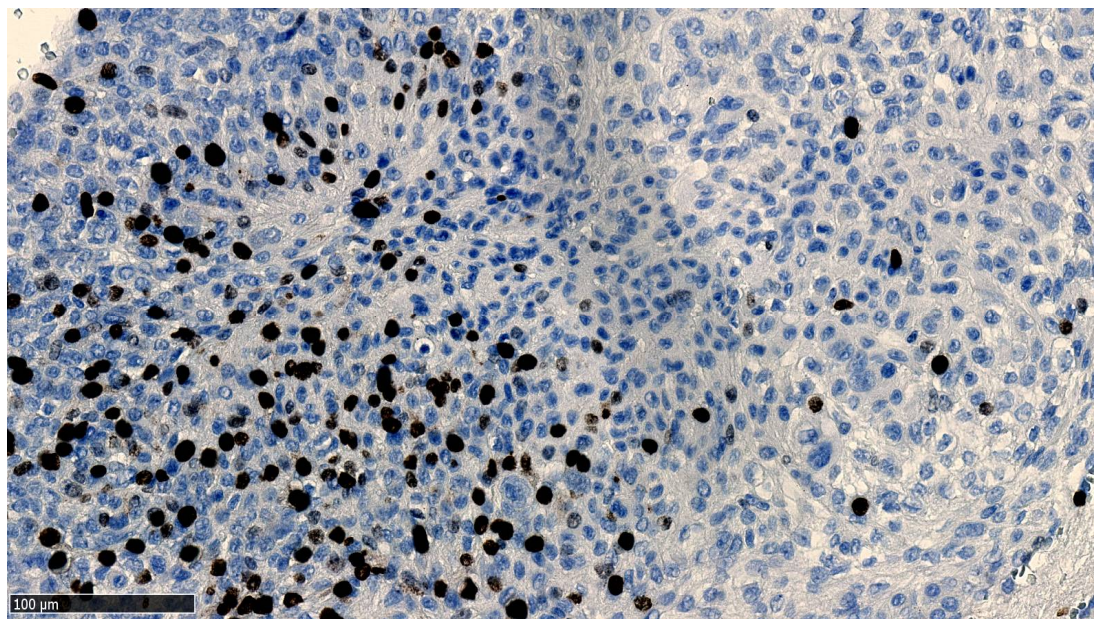

**Figure S3.** Case 3.

Details of proliferative pattern in a type 1 tumor. A clear 'thinning out' of Ki-67 positive cells across a short distance is seen. Anaplastic meningioma, WHO grade III. Total magnification  $\times 300$ .

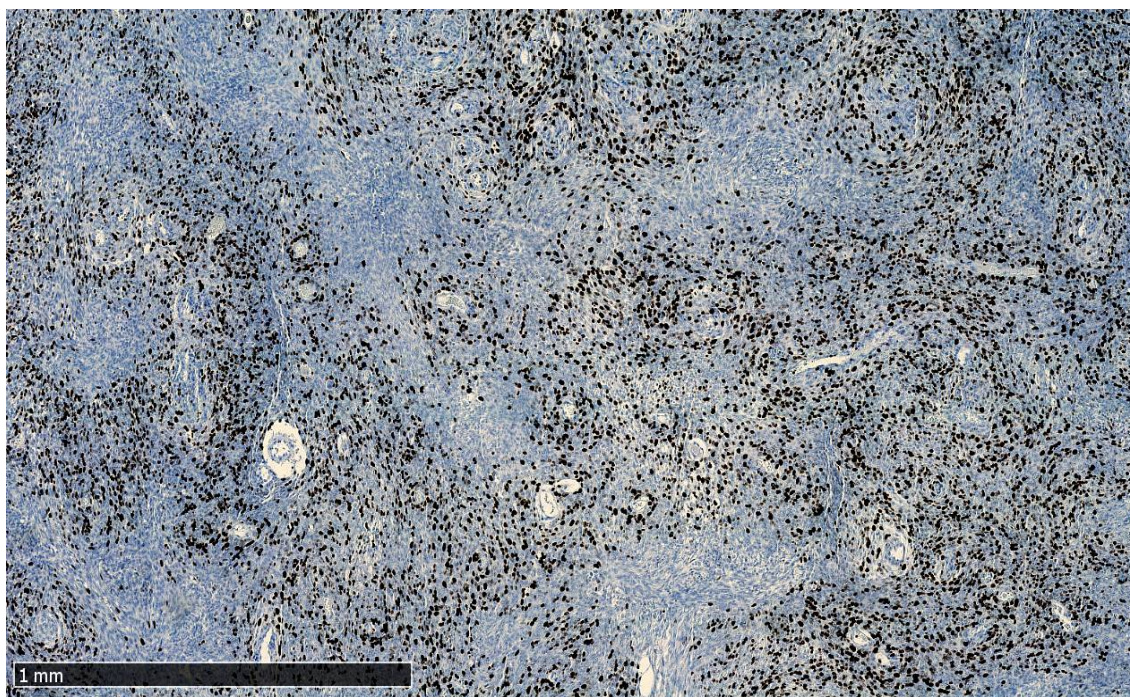

**Figure S4.** Case 4.

Case 4: Type 1 proliferative pattern, heterogenous area. Same tumor as shown in figure 1. Anaplastic meningioma, WHO grade III. Total magnification  $\times 40$ .

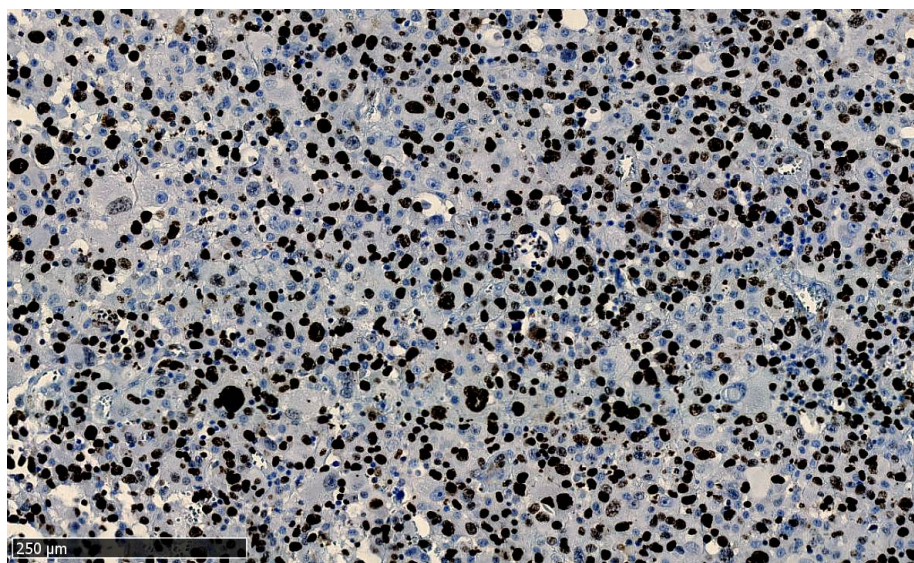

**Figure S5.** Case 5.

Case 5: Highly proliferative and homogenous area of a rhabdoid meningioma, WHO grade III. A type 1 proliferative pattern was observed. In other areas of the tumor, we saw a clear hot spot pattern. Total magnification  $\times 100$ .

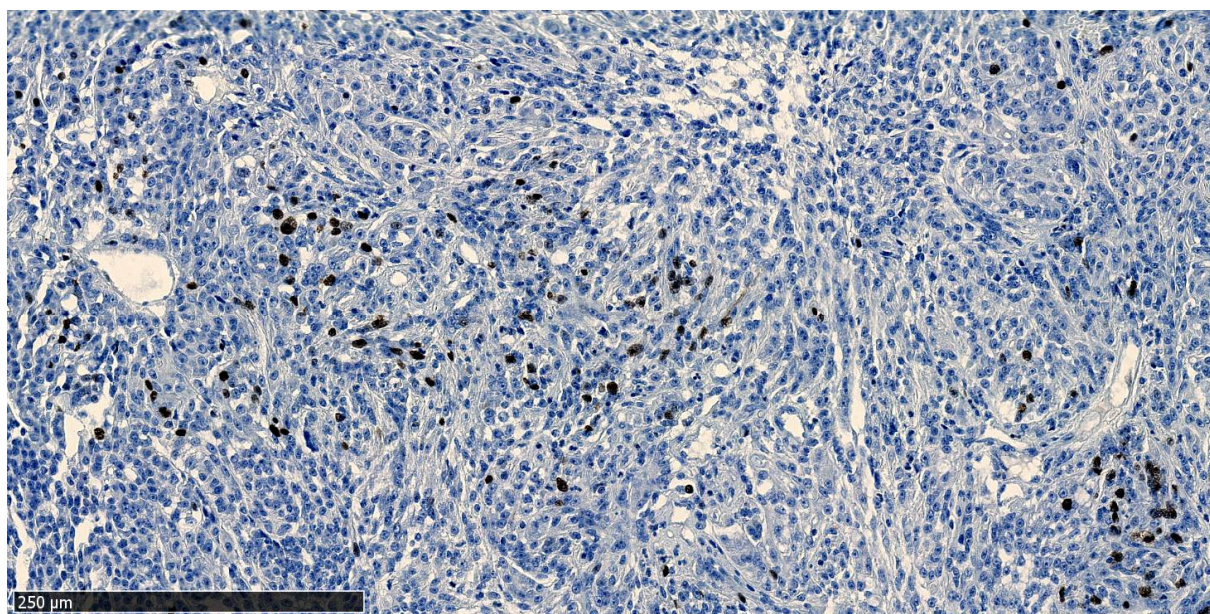

**Figure S6.** Case 6.

Case 6: Type 1 proliferative pattern with large areas of negative cells in between Ki-67 positive hot spots. This case had extensive lymphocyte infiltration. Rhabdoid meningioma, WHO grade III. Total magnification  $\times 150$ .

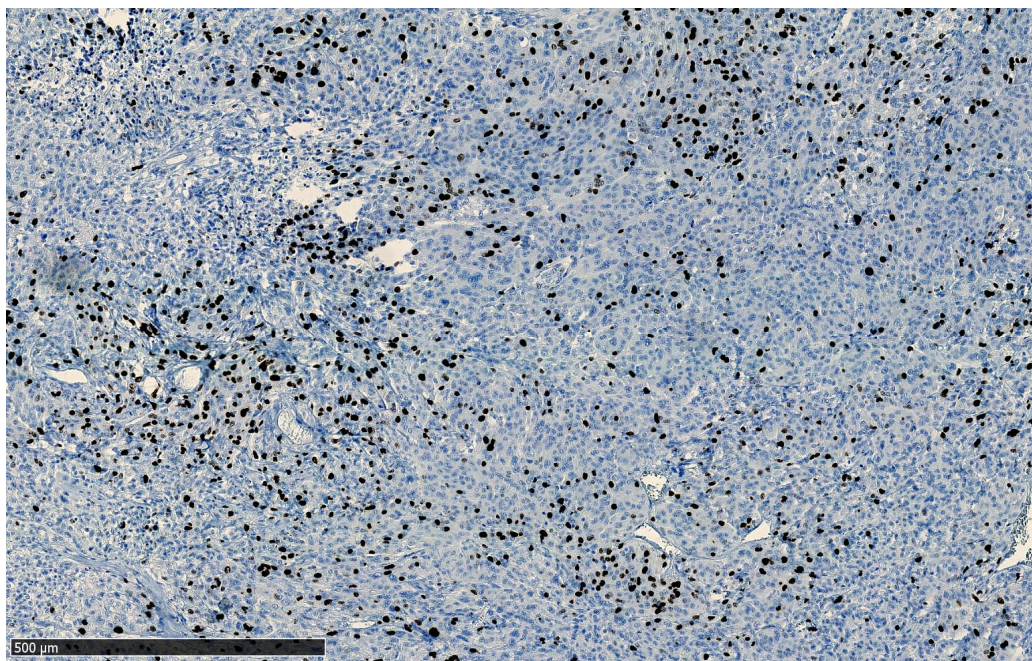

**Figure S7.** Case 7.

Case 7: Hot spots seen on a 'background level' of proliferative activity: A type 2 proliferative pattern. Anaplastic meningioma, WHO grade III. Total magnification  $\times 90$ .

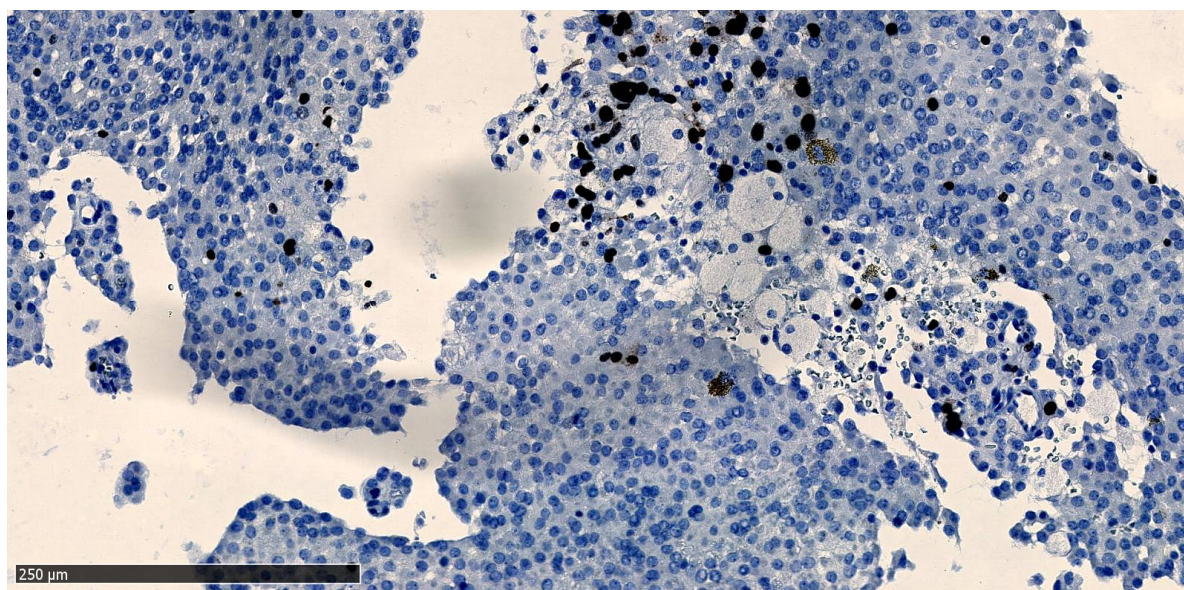

**Figure S8.** Case 8.

Case 8: Type 1 proliferative pattern in a fragmented sample of rhabdoid meningioma, WHO grade III. Fragmentation makes pattern recognition difficult, but some islands of tumor cells were seen without Ki-67 positive cells. Total magnification  $\times 150$ .

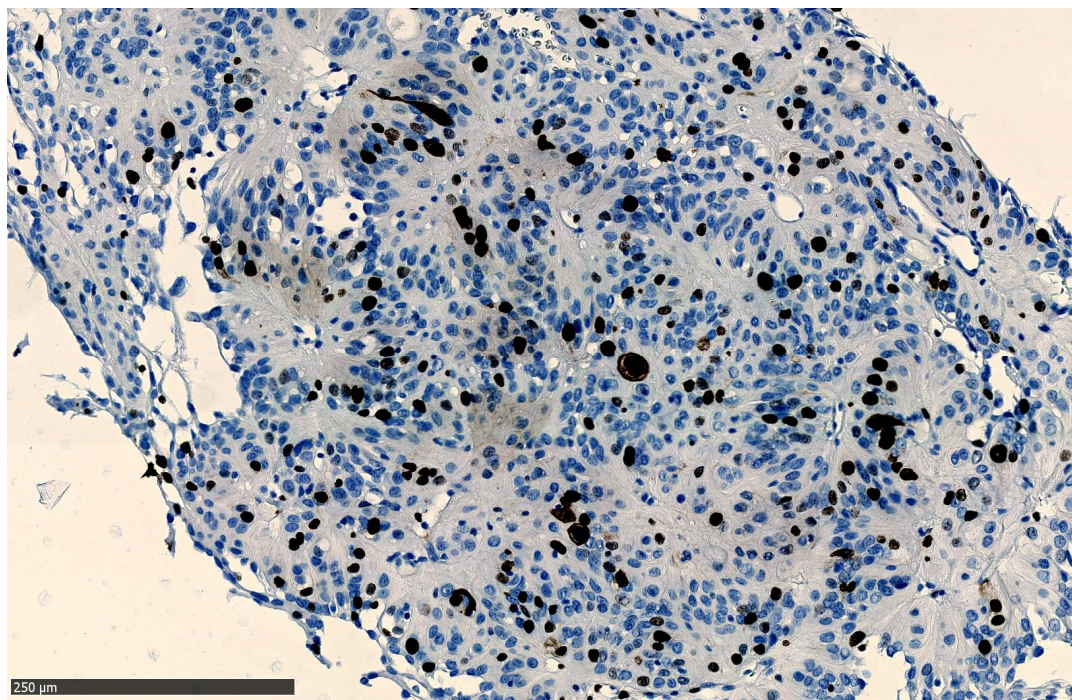

**Figure S9.** Case 9.

Case 9: More homogenous part of proliferative type 2 papillary meningioma, WHO grade III, but classification of the proliferative pattern was difficult because of the papillary formations. Total magnification  $\times 150$ .

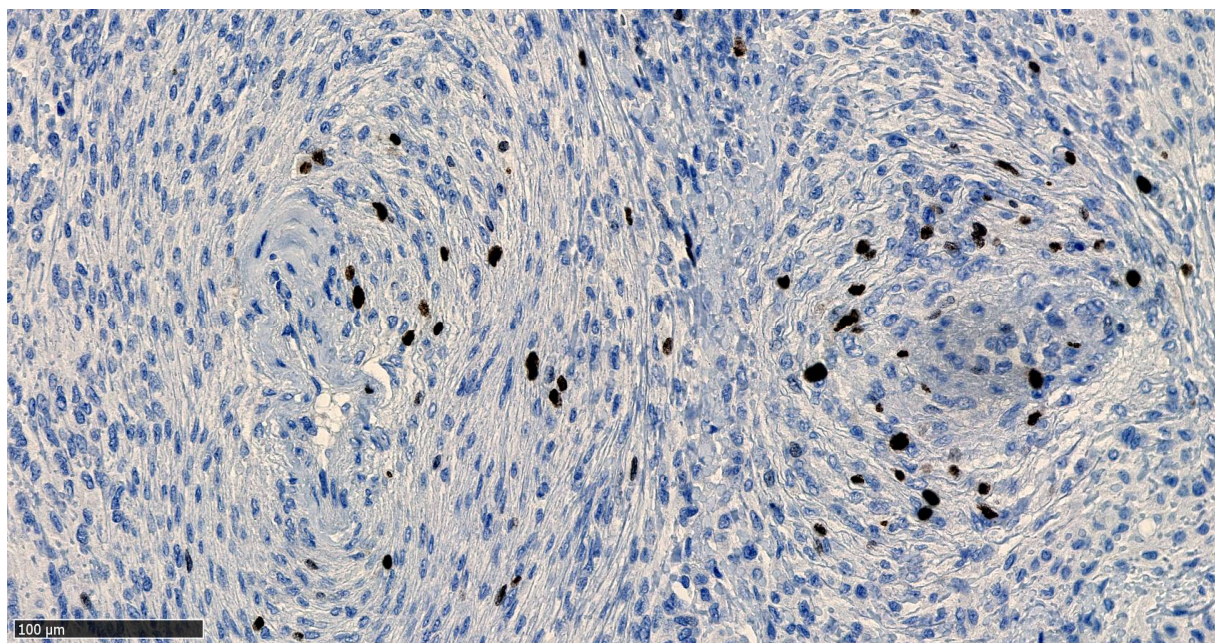

**Figure S10.** Case 10.

Case 10: Detail of type 1 proliferative pattern, anaplastic meningioma, WHO grade III. Total magnification  $\times 230$ .

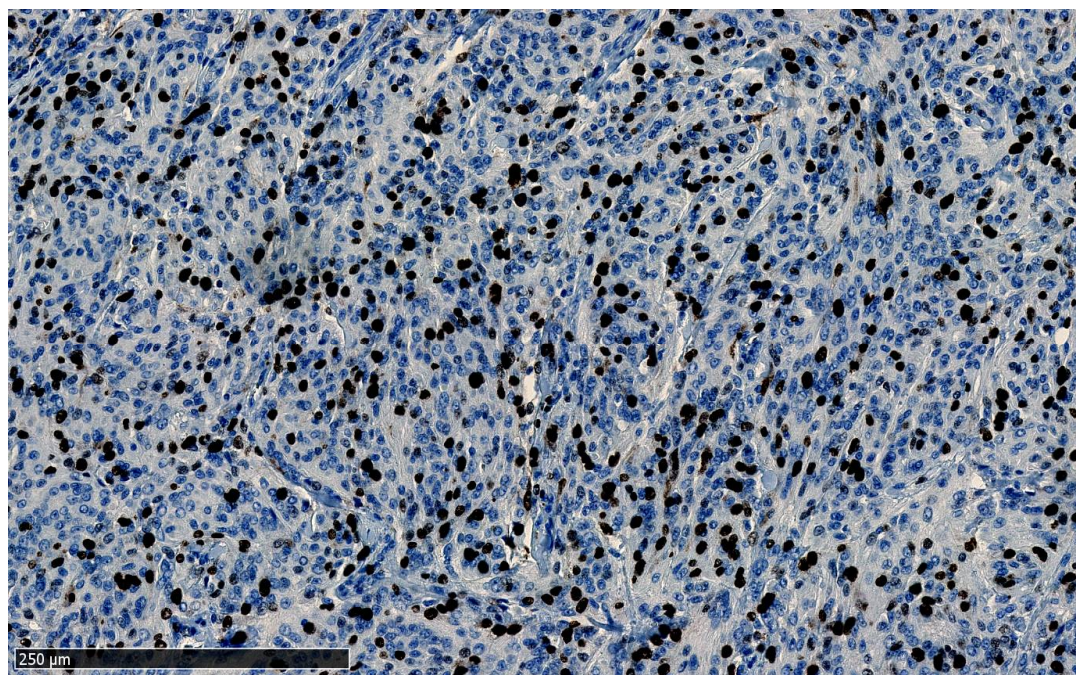

**Figure S11.** Case 11.

Case 11: Homogenous area of highly proliferative active and cell dense anaplastic meningioma, WHO grade III, type 1 proliferative pattern. Other areas of tumor presented with clear hot spots formations. Total magnification  $\times 150$ .

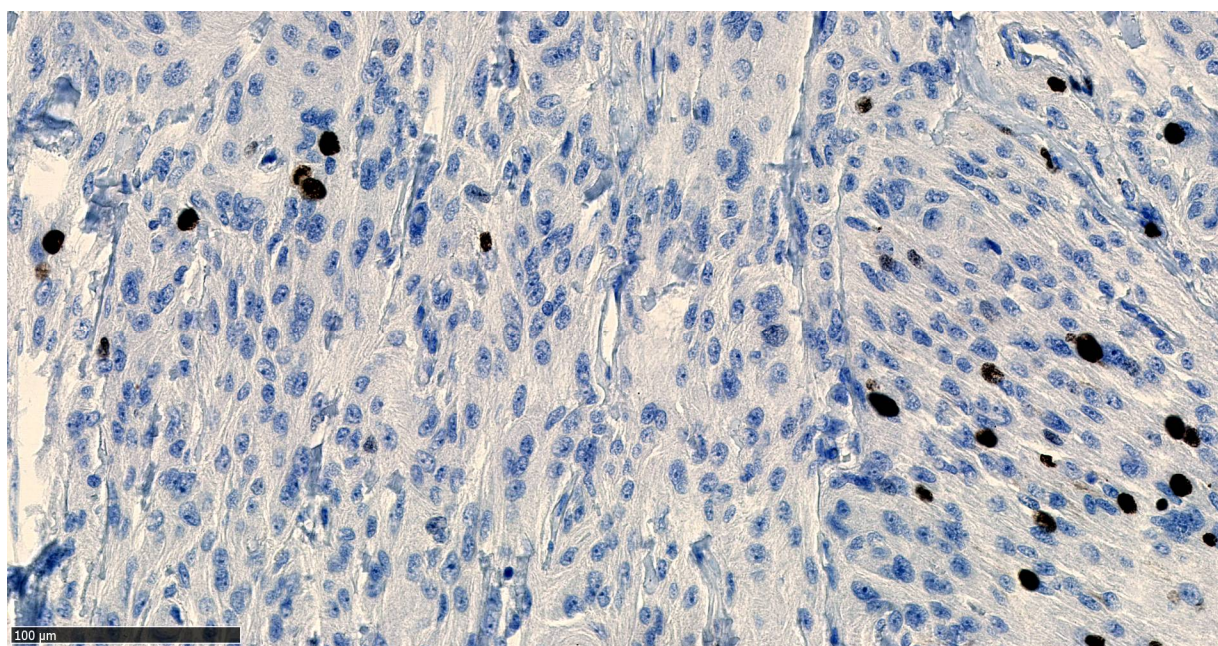

**Figure S12.** Case 12.

Case 12: Detail of type 1 proliferative pattern in a tumor with relatively sparse Ki-67 positive cells. Anaplastic meningioma, WHO grade III. Total magnification  $\times 300$ .

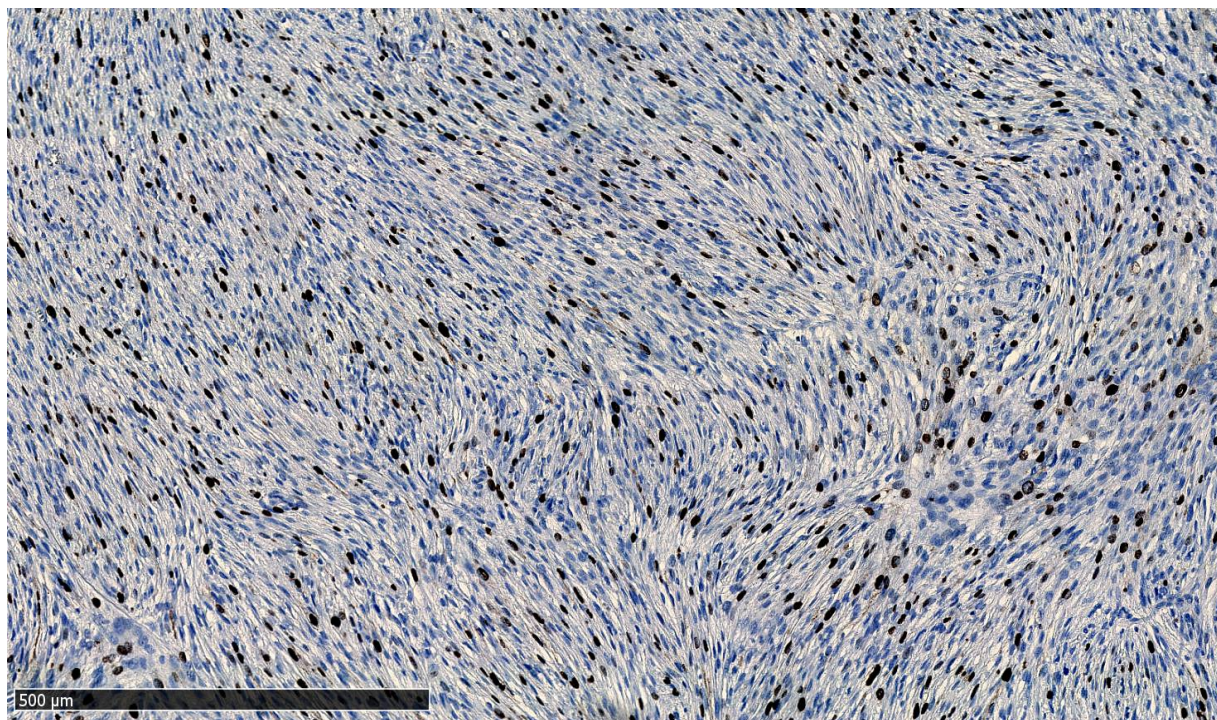

Figure S13. Case 13.

Case 13: Type 2 proliferative tumor. Anaplastic meningioma, WHO grade III. Total magnification  $\times 100$ .

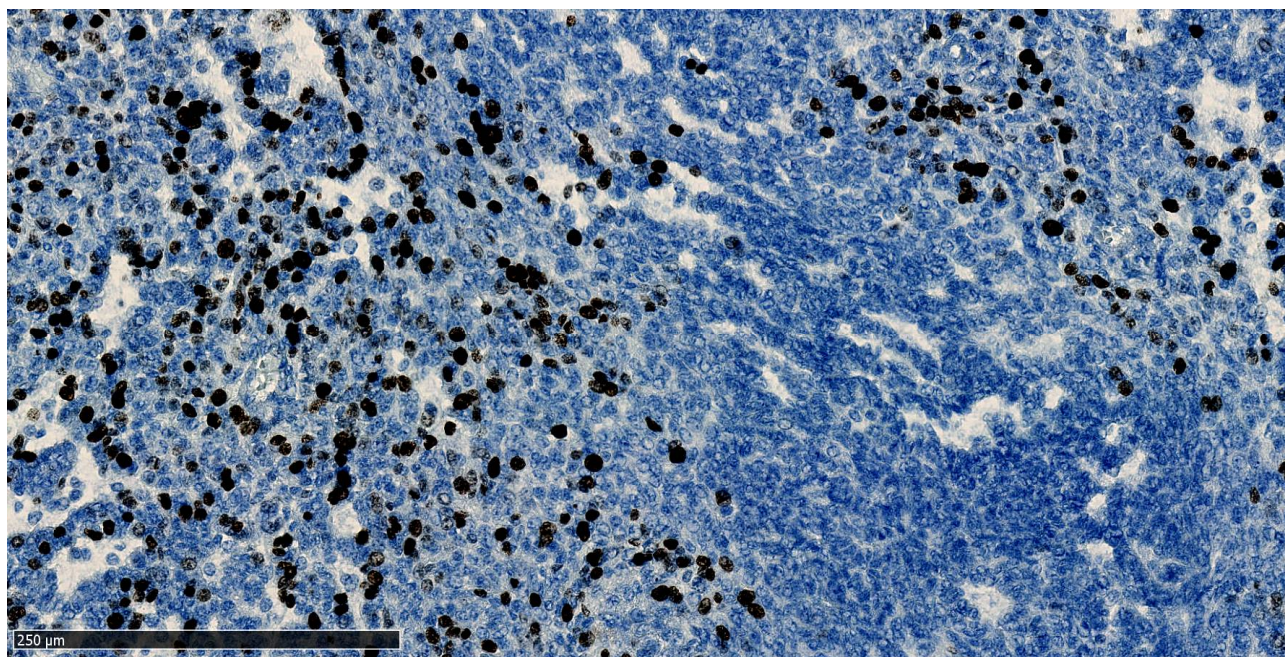

Figure S14. Case 14.

Case 14: Type 1 proliferative pattern, anaplastic meningioma, WHO grade III. Total magnification  $\times 200$ .

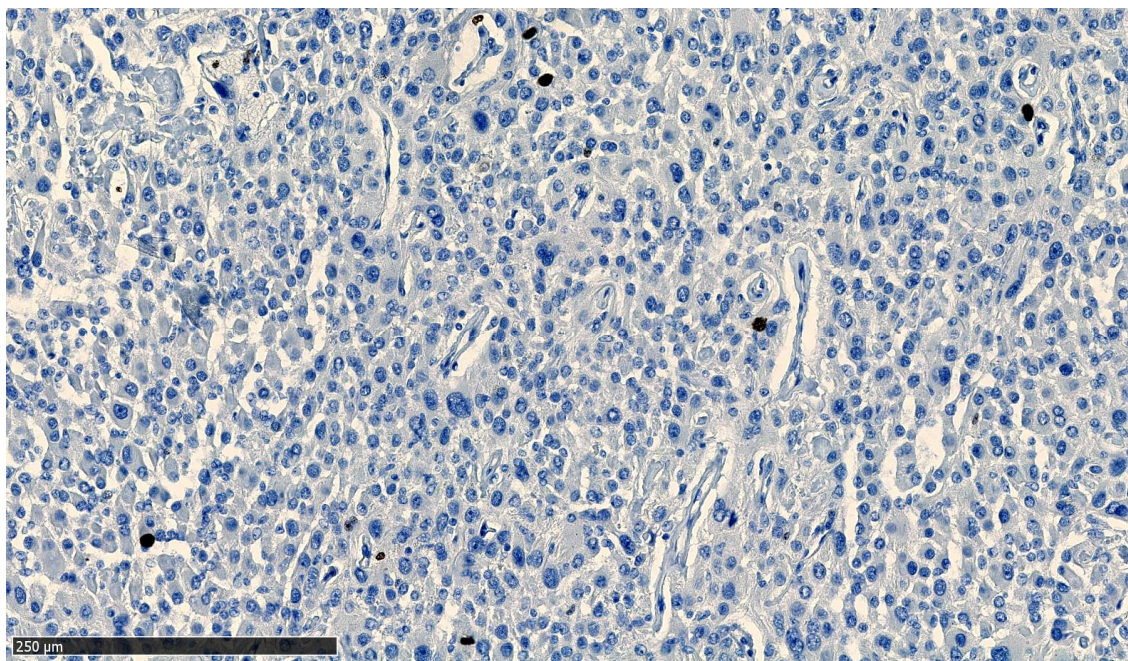

**Figure S15.** Case 15.

Case 15: Low proliferative index in a rhabdoid meningioma, WHO grade III, with a type 1 proliferative pattern. In other areas small hot spots were observed. In low proliferative index it is difficult to establish proliferation type. Total magnification  $\times 150$ .

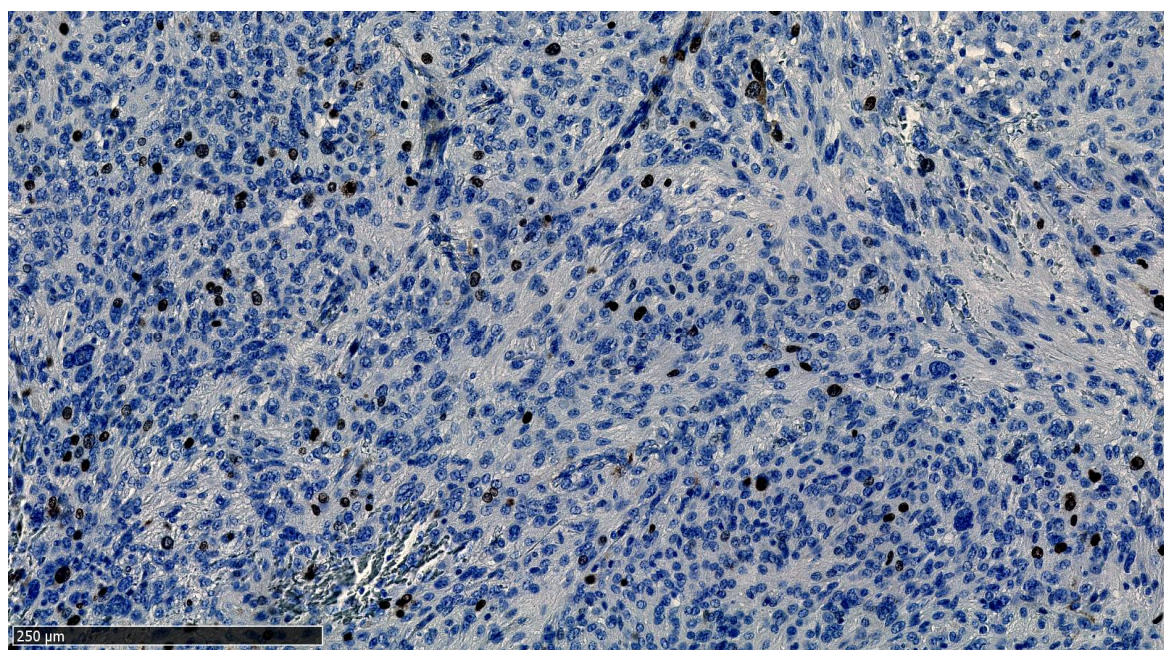

**Figure S16.** Case 16.

Case 16: Type 2 proliferative pattern between hot spots in an anaplastic meningioma, WHO grade III. Total magnification  $\times 150$ .

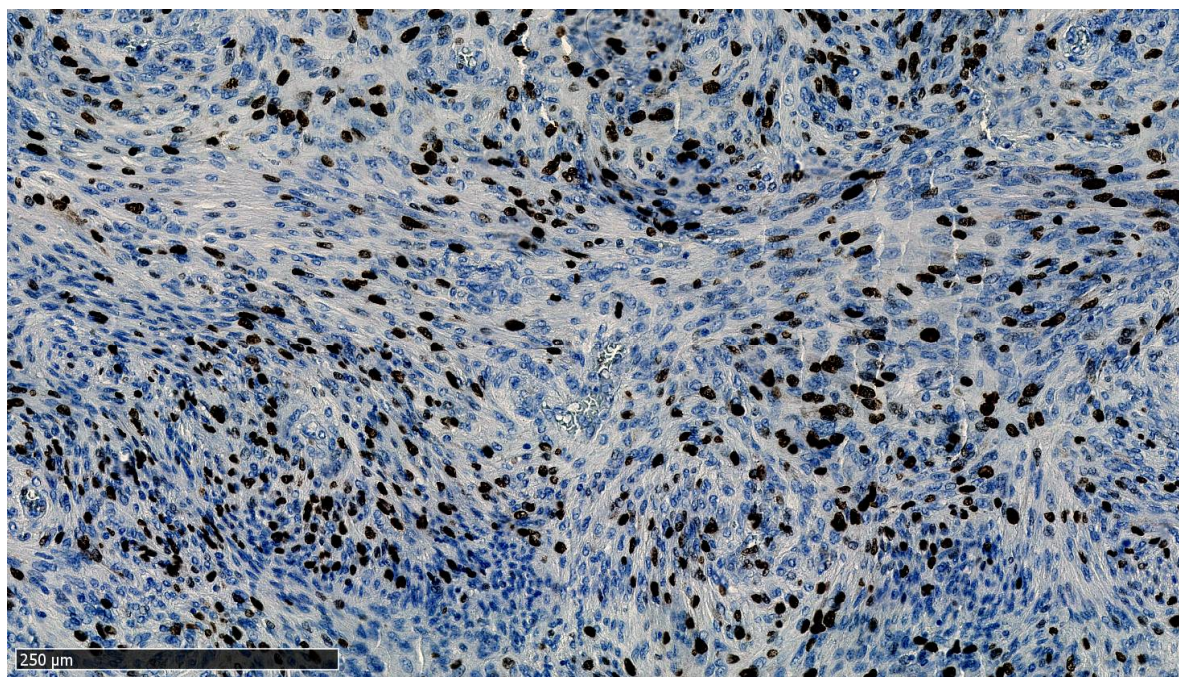

**Figure S17.** Case 17.

Case 17: Type 2 proliferative pattern. Anaplastic meningioma, WHO grade III. Total magnification  $\times 150$ .

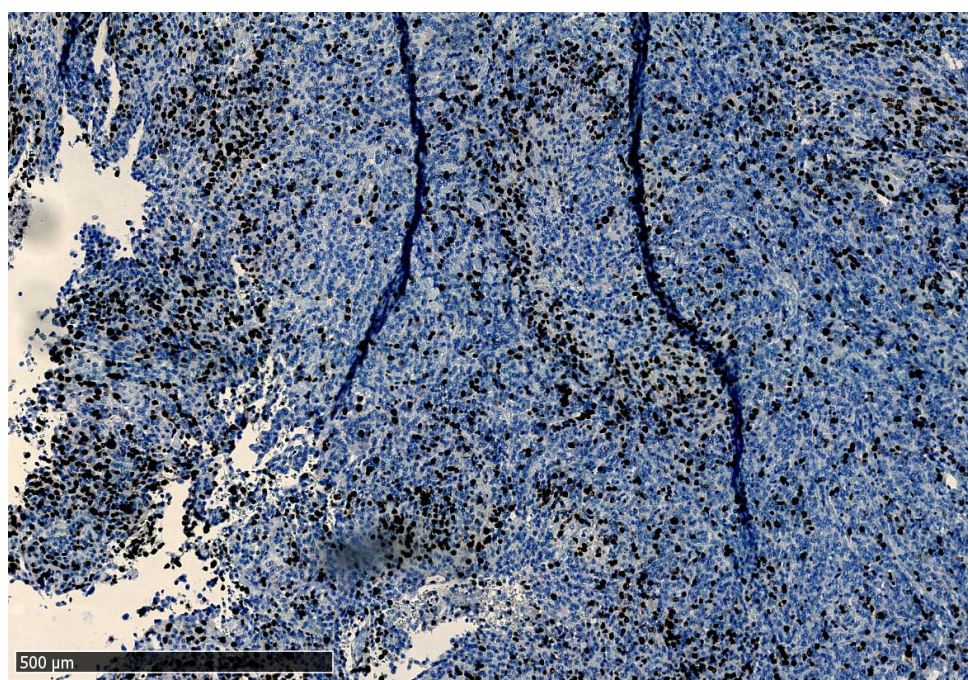

**Figure S18.** Case 18.

Case 18: Type 2 proliferative pattern, anaplastic meningioma, WHO grade III. Unfortunately, seen with artefactual folding and a rather thick slide. Hot spot areas in an otherwise type 2 proliferative pattern. Total magnification  $\times 70$ .

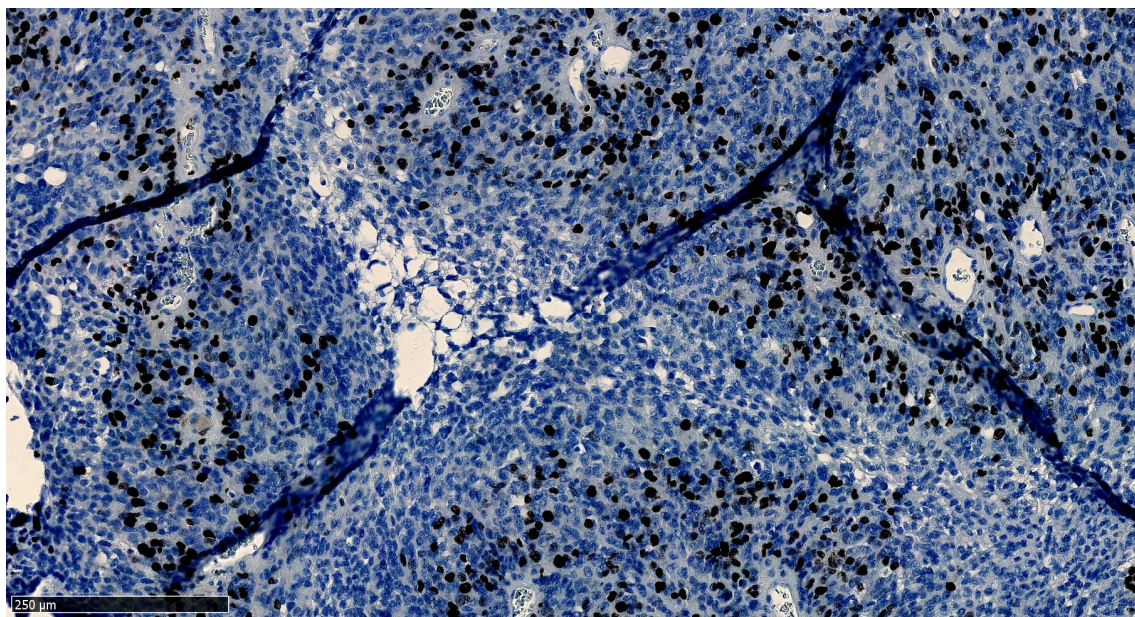

**Figure S19.** Case 19.

Case 19: Type 1 proliferative pattern, papillary meningioma, WHO grade III. “Clean” areas between hot spots (compared to case 18). Unfortunately, with artefactual folding and a rather thick slide. Total magnification  $\times 100$ .

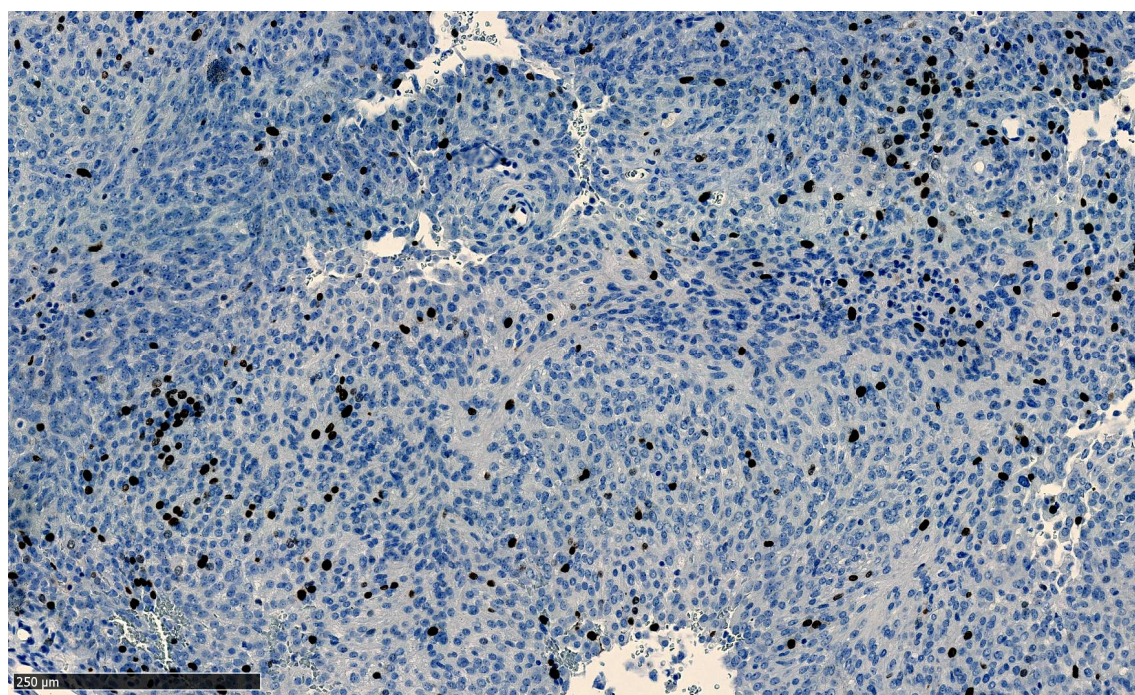

**Figure S20.** Case 20.

Case 20: Type 2 proliferative pattern, anaplastic meningioma, WHO grade III. Two hot spots in lower left and upper right corners on a relatively low proliferative background. Total magnification  $\times 70$ .

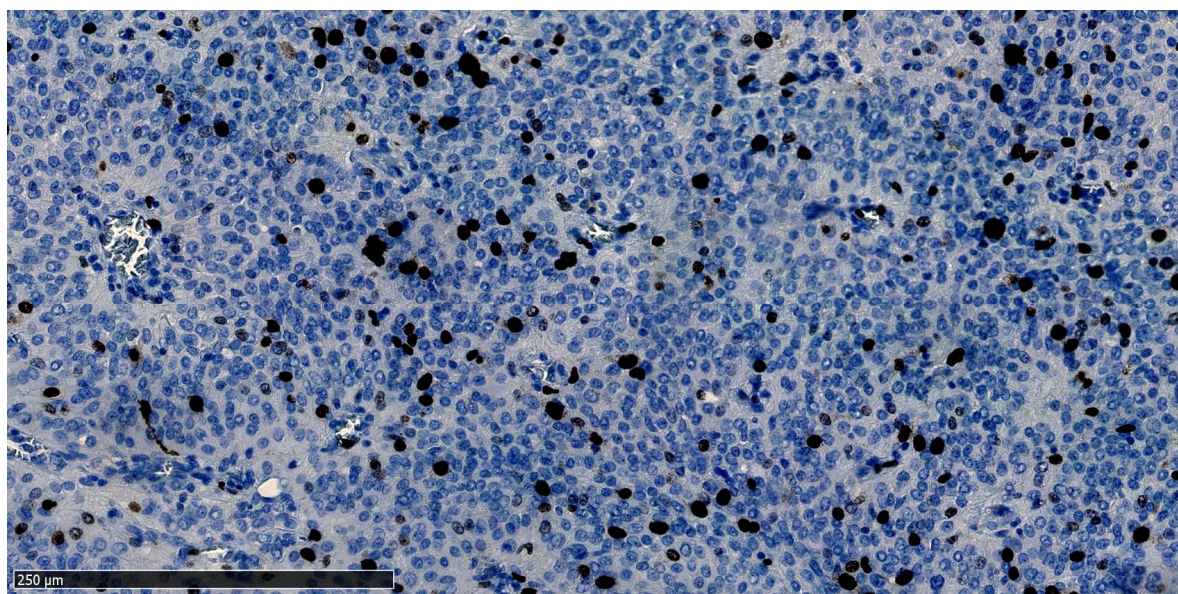

**Figure S21.** Case 21.

Case 21: Type 2 proliferative pattern, papillary meningioma, WHO grade III. Total magnification  $\times 200$ .

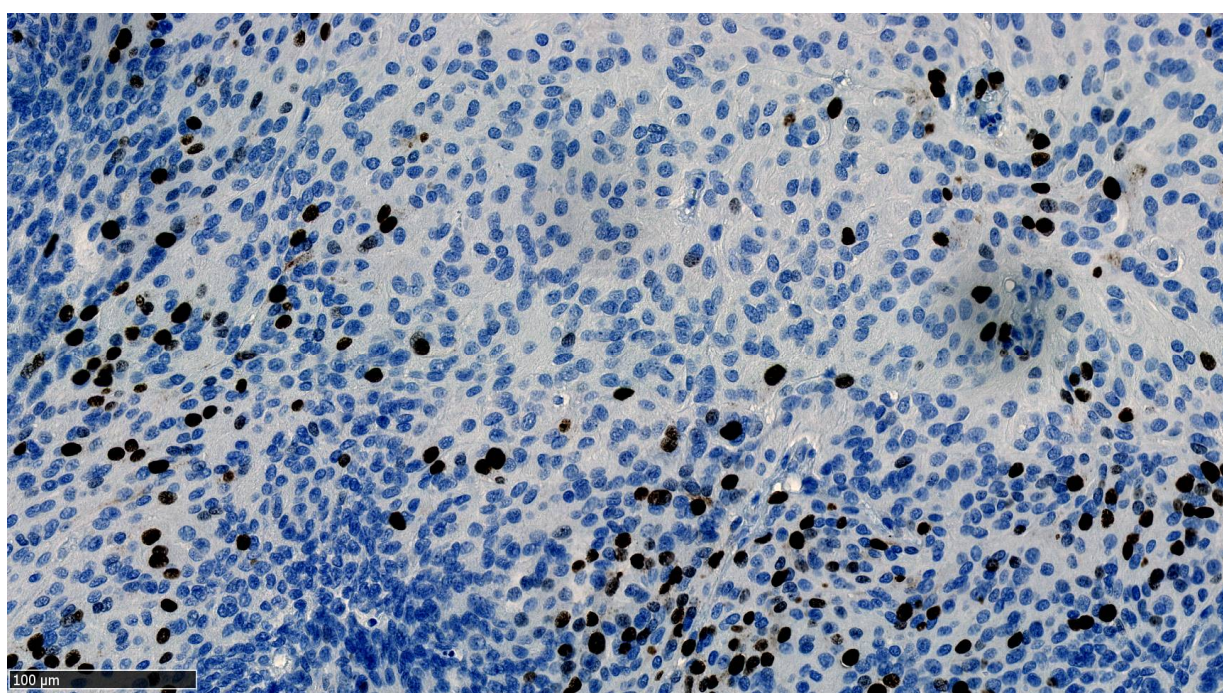

**Figure S22.** Case 22.

Case 22: Type 1 proliferative pattern, anaplastic meningioma, WHO grade III. Total magnification  $\times 240$ .

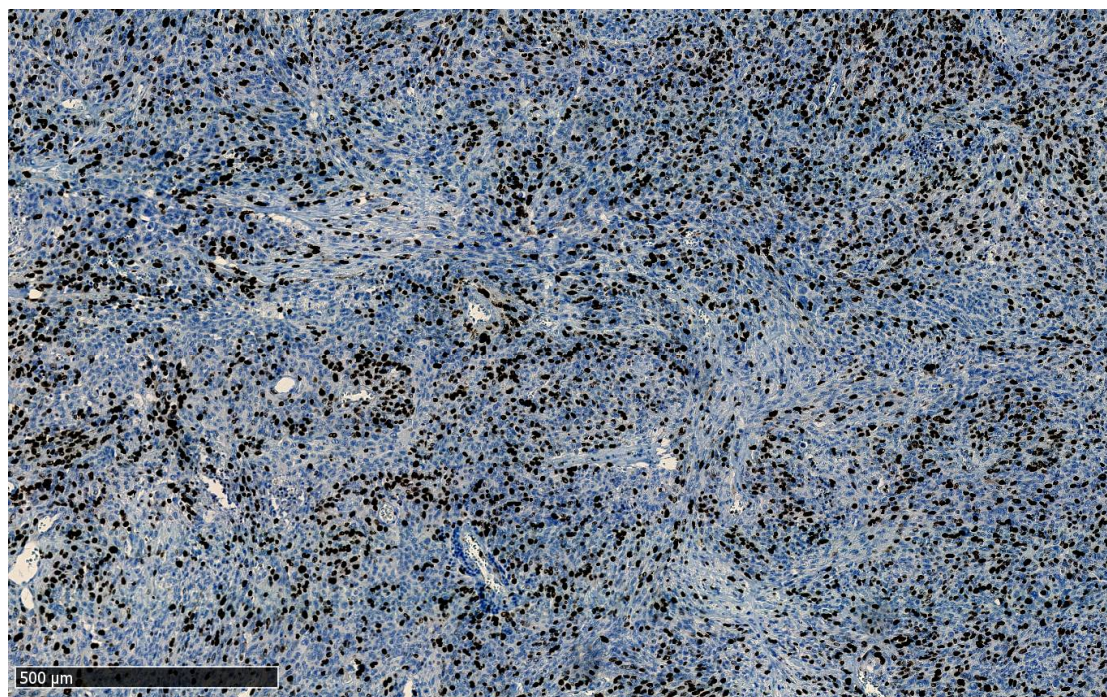

**Figure S23.** Case 23.

Case 23: Type 2 proliferative tumor, anaplastic meningioma, WHO grade III. Total magnification  $\times 50$ .

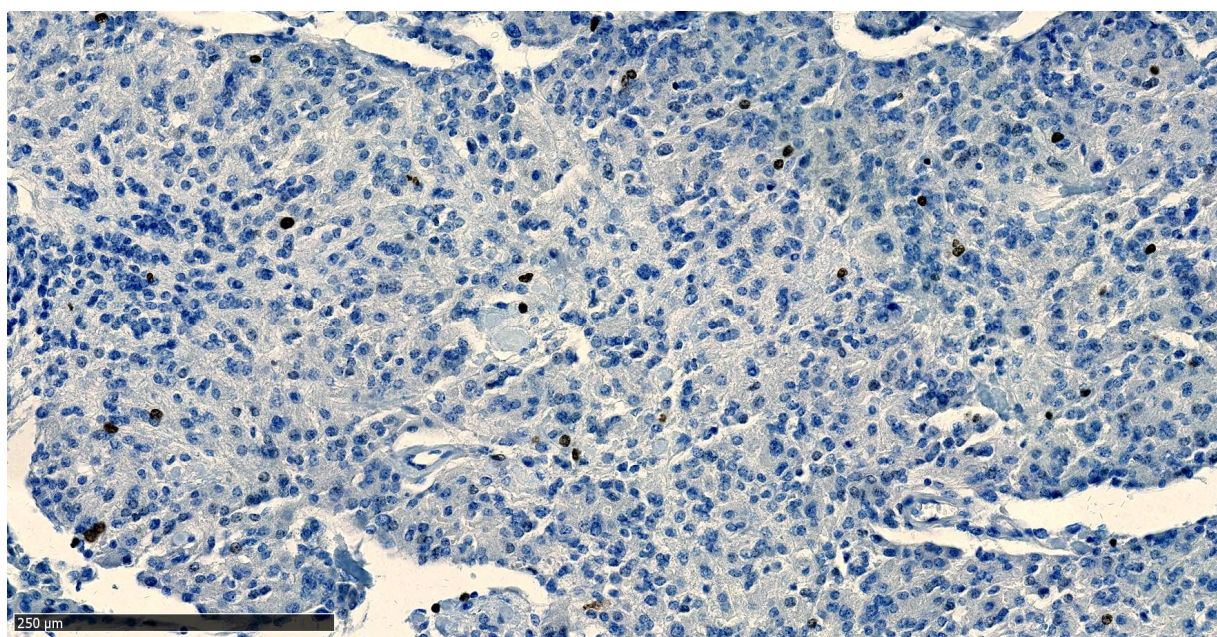

**Figure S24.** Case 24.

Case 24: Proliferative background level in type 2 proliferative pattern in a papillary meningioma, WHO grade III. Total magnification  $\times 150$ .

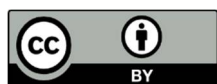

© 2020 by the authors. Licensee MDPI, Basel, Switzerland. This article is an open access article distributed under the terms and conditions of the Creative Commons Attribution (CC BY) license (<http://creativecommons.org/licenses/by/4.0/>).
